# Supplementary material for: A cytorhabdovirus phosphoprotein forms mobile inclusions trafficked on the actin/ER network for viral RNA synthesis
Source: PubMed Central journal article supplement — J Exp Bot. 2019 Apr 25;70(15):4049–62. doi: 10.1093/jxb/erz195 (PMC6685698; doi:10.1093/jxb/erz195), 2019-04-25
Supplement: erz195_suppl_supplementary_table_s1_figures_s1-s5.pdf [file erz195_suppl_supplementary_table_s1_figures_s1-s5.pdf]

**Table S1 Primers used in this study**

| Primer               | Primer sequence                                             | Purpose            |
|----------------------|-------------------------------------------------------------|--------------------|
| BYS2-PGD F           | CAGATCTCGA GCTCAAATGA GCTCATCCAA TGCTGC                     | PGDG-P             |
| BYS2-PGD R           | GTCGACTGCAGAATTCGATTAGAGATCTCCATAAGGATC                     |                    |
| BYS PGDG SalI F      | AAGCTTCGAATTCTGCAGTCGACATGAGCTCATCCAATGCTGCAGT              | PGDG-P1-55         |
| BYS P165 PGDG SalI R | GGCCCCGCGGTACCGTCGACTTACTTTTCTTCTTCTCTGTTCTTCTAC            |                    |
| BYS P43 PGDG SalI F  | AAGCTTCGAATTCTGCAGTCGACGCGGAGAATGATGTAGAAGAACAGGAA          | PGDG-P43-295       |
| BYS PGDG SalI R      | GGCCCCGCGGTACCGTCGACTTAGAGATCTCCATAAGGATCATGACGGGA          |                    |
| BYS P56 PGDG SalI F  | AAGCTTCGAATTCTGCAGTCGACATGGTACCTACCATCAAGGGGAGAG            | PGDG-P56-295       |
| BYS PGDG SalI R      | GGCCCCGCGGTACCGTCGACTTAGAGATCTCCATAAGGATCATGACGGGA          |                    |
| BYS PGDG SalI F      | AAGCTTCGAATTCTGCAGTCGACATGAGCTCATCCAATGCTGCAGT              | PGDG-P1-207        |
| BYS P207 PGDG SalI R | GGCCCCGCGGTACCGTCGACATTTGTATTCTTCTTCTCTCCCTGGGCC            |                    |
| BYS P208 PGDG SalI F | AGCTTCGAATTCTGCAGTCGACTCAGAGGATTATAATTATGACAAATTTCTATCTATGA | PGDG-P208-295      |
| BYS PGDG SalI R      | GGCCCCGCGGTACCGTCGACTTAGAGATCTCCATAAGGATCATGACGGGA          |                    |
| BYS L SPE I F        | CCGGGGTCGACATTTAAATACTAGTATGGATCTTCTCGAAGATGATGT            | pSuper-L-mCherry   |
| BYS L SPE I R        | CATGGTACCGGATCCACTAGTATAGGGAGTTGTAATGATGCC                  |                    |
| BYS P2 PGD salI F    | TCAAGCTTCGAATTCTGCAGTCGACATGGTACCTACCATCAAGGG               | PGD-P56-295        |
| BYS P PGD SalI R     | CGGGCCCCGCGGTACCGTCGACTTAGAGATCTCCATAAGGAT                  |                    |
| ABD2 PGDR F          | AGCTTCGAATTCTGCAGTCGACGAGATCGTTGAAGGATCTT                   | PGD-ECFP-ABD2      |
| ABD2 PGDR R          | GGCCCCGCGGTACCGTCGACCTATTCGATGGATGCTTCC                     |                    |
| ECFP PGDBm SalI F    | CTTCGAATTCTGCAGTCGACATGGTGGAGCAAGGGCGA                      | PGD-ECFP-ABD2-EGFP |
| ABD2-ECFP-MYC SalI R | GGGGCCCCGCGGTACCGTCGACTTCGATGGATGCTTCTCTGAG                 |                    |
| NCMV N PGDG SalI F   | CTTCGAATTCTGCAGTCGACATGGCAAATGAGACAAGA                      | PGDG-NCMV-N        |
| NCMV N PGDG SalI R   | GGGGCCCCGCGGTACCGTCGACTTACATCCGAACACTTCAT                   |                    |
| P(GIQVE121AAAAA) F   | GTTGAACTTTTCTCCTTGCAGCTGCAGCGGCGAGAAATACTTCAGTAGACAA        | PGDG-PLC8M         |
| P(GIQVE122AAAAA) R   | TTGTCTACTGAAGTATTTCTCGCCGCTGCAGCTGcAAGGAGGAAAAGTTCAAC       |                    |
| BYS P56 PGDG SalI F  | AAGCTTCGAATTCTGCAGTCGACATGGTACCTACCATCAAGGGGAGAG            | PGDG-P2LC8M        |
| BYS PGDG SalI R      | GGCCCCGCGGTACCGTCGACTTAGAGATCTCCATAAGGATCATGACGGGA          |                    |
| BYS1-PGD F           | CAGATCTCGA GCTCAAATGG CAAAAGAAGA TCATGG                     | PGD-N              |
| BYS1-PGD R           | GTCGACTGCAGAATTCGATTAGGAGAAGATCTGGTCAG                      |                    |
| BYS2-PGD F           | CAGATCTCGA GCTCAAATGA GCTCATCCAA TGCTGC                     | PGD-P              |
| BYS2-PGD R           | GTCGACTGCAGAATTCGATTAGAGATCTCCATAAGGATC                     |                    |
| BYSMV L F            | TTCTCAGATCTCGAGCTCAATGGATCTTCTCGAAGATGATGTC                 | PGD-L              |
| BYSMV L R            | GGTACCGTCGACTGCAGAATTCGACGATAGGGAGTTGTAATGATGC              |                    |
| BYS1-F(Xho1)         | CCGCTCGAGCTATGGCAAAGAAGATCATGGA                             | PGDG-N             |
| BYS1-R(Sal1)         | ACGCGTCGACGGAGAAGATCTGGTCAGCATT                             |                    |
| BYS2-F(Xho1)         | CCGCTCGAGCTATGAGCTCATCCAATGCTGCA                            | PGDG-P             |
| BYS2-R(BamH1)        | CGGGATCCGAGATCTCCATAGGGATCATG                               |                    |
| BYS1-F(Xho1)         | CCGCTCGAGCTATGGCAAAGAAGATCATGGA                             | PGDGm-N            |
| BYS1-R(Sal1)         | ACGCGTCGACGGAGAAGATCTGGTCAGCATT                             |                    |
| BYS2-F(Xho1)         | CCGCTCGAGCTATGAGCTCATCCAATGCTGCA                            | PGDGm-P            |
| BYS2-R(Sal1)         | ACGCGTCGACGAGATCTCCATAGGGATCAT G                            |                    |
| BYS1-PGD F           | CAGATCTCGA GCTCAAATGG CAAAAGAAGA TCATGG                     | PGD-ECFP-N         |

|                           |                                                  |              |              |
|---------------------------|--------------------------------------------------|--------------|--------------|
| BYS1-PGD R                | GTCGACTGCAGAATTCGATTAGGAGAAGATCTGGTCAG           |              |              |
| BYS PGDG SalI F           | AAGCTTCGAATTCTGCAGTCGACATGAGCTCATCCAATGCTGCAGT   | PGDR-P       |              |
| BYS PGDG SalI R           | GGCCCCGGTACCGTCGACTTAGAGATCTCCATAAGGATCATGACGGGA |              |              |
| BYS2-PGD F                | CAGATCTCGA GCTCAAATGA GCTCATCCAA TGCTGC          | PGD-ECFP-P   |              |
| BYS2-PGD R                | GTCGACTGCAGAATTCGATTAGAGATCTCCATAAGGATC          |              |              |
| MR-PUM-F                  | TTGATAGTTTTTTGAATAGATGTCATCTTTCTGGAAACGTCAAA     | MR(+) PUM    |              |
| MR-PUM-R                  | GGTAAAGGAGAAGAACTTTTC                            |              |              |
| BYS25U-R                  | ATTGACCAAGATTGAAATTCGAAC                         | MR(+) ECFP   |              |
| MR1-F                     | CCATAGTATAAATAATAAAAACCAT                        |              |              |
| miniECFP-F                | GTGAGCAAGGGCGAGGAGCTG                            |              |              |
| miniECFP-R                | TTATTTATACTATGGTTACTTGTACAGCTCGTCCATGCC          |              |              |
| p19-F                     | CCTTATCTGGGAACTACTCACACAT                        |              |              |
| p19-R                     | GCGCGCTATATTTGTTTTCT                             | pGD-VSRs     |              |
| Hepro-F                   | AAACAAAATATAGCGCGCCTCACACATTATTATGGAGAA          |              |              |
| Hepro-R                   | CGCGCGATAATTATCCTAGTTT                           |              |              |
| γb-F                      | TAGGATAAAITATCGCGCGAATTCGAGCTCCACCGCG            |              |              |
| γb-R                      | GTTTAATTCCCGATCTAGTAACATAGATGACAC                |              |              |
| V-F                       | TACTAGATCGGGAATTAACATCAGTG                       |              |              |
| V-R                       | AGTTCCAGATAAGGGAATTAGGGTTC                       |              |              |
| NCMV N F ( <b>Hind3</b> ) | CCCAAGCTTCGATGGCAAATGAGCACAAGAG                  |              | PGDG-NCMV-N/ |
| NCMV N R ( <b>Sal1</b> )  | ACGCGTCGACCATTCCGAACACTTCATCCGC                  |              | PGDGm-NCMV-N |
| NCMV P F ( <b>Hind3</b> ) | CCCAAGCTTCGATGGATAAGAAAGCAAGTGG                  |              | PGDG-NCMV-P/ |
| NCMV P R ( <b>Sal1</b> )  | ACGCGTCGACAAAGTCGGCATAACGGGTCCTTC                | PGDGm-NCMV-P |              |
| QC BYS P56G-A F           | AAGAAGAAGAAAAGATAGTACCTACCATCAAGGGGG             | PGD-PM56I    |              |
| QC BYS P56G-A R           | TTGATGGTAGGTACTATCTTTCTTCTTCTCTCTGC              |              |              |

Note: F, forward; R, reverse

# Supplementary Figure 1

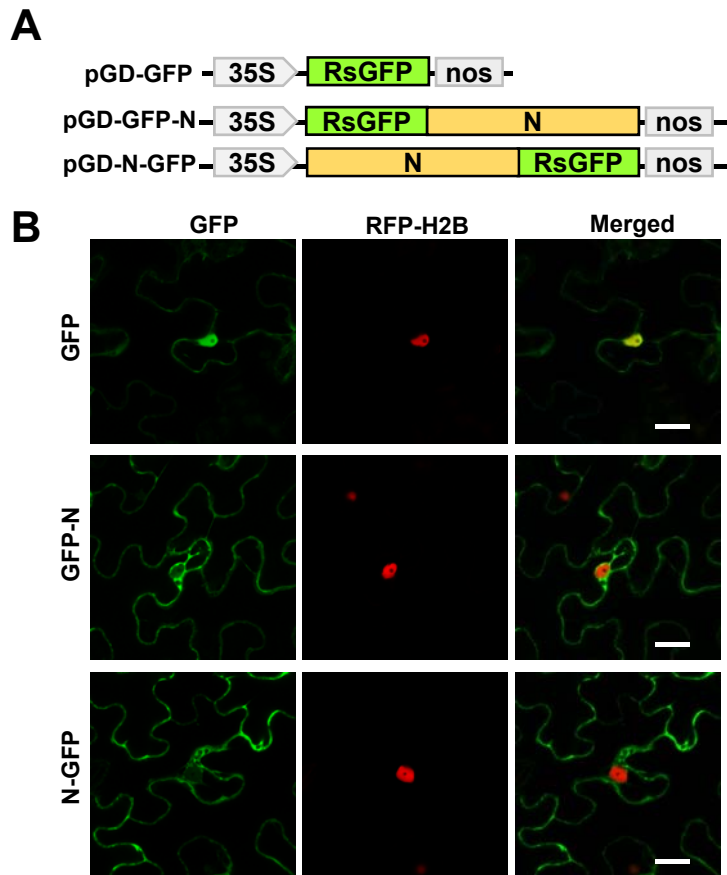

**Supplementary Figure 1. Confocal micrographs showing the subcellular localization of the BYSMV N protein.** (A) Schematic diagram of pGD vectors for expression of free GFP, GFP-N or N-GFP. (B) Subcellular distribution of free GFP, GFP-N, and N-GFP in the epidermal cells of agroinfiltrated leaves of transgenic *N. benthamiana* with histone 2B (RFP-H2B) at 2 dpi. Bar = 20  $\mu$ m.

## Supplementary Figure 2

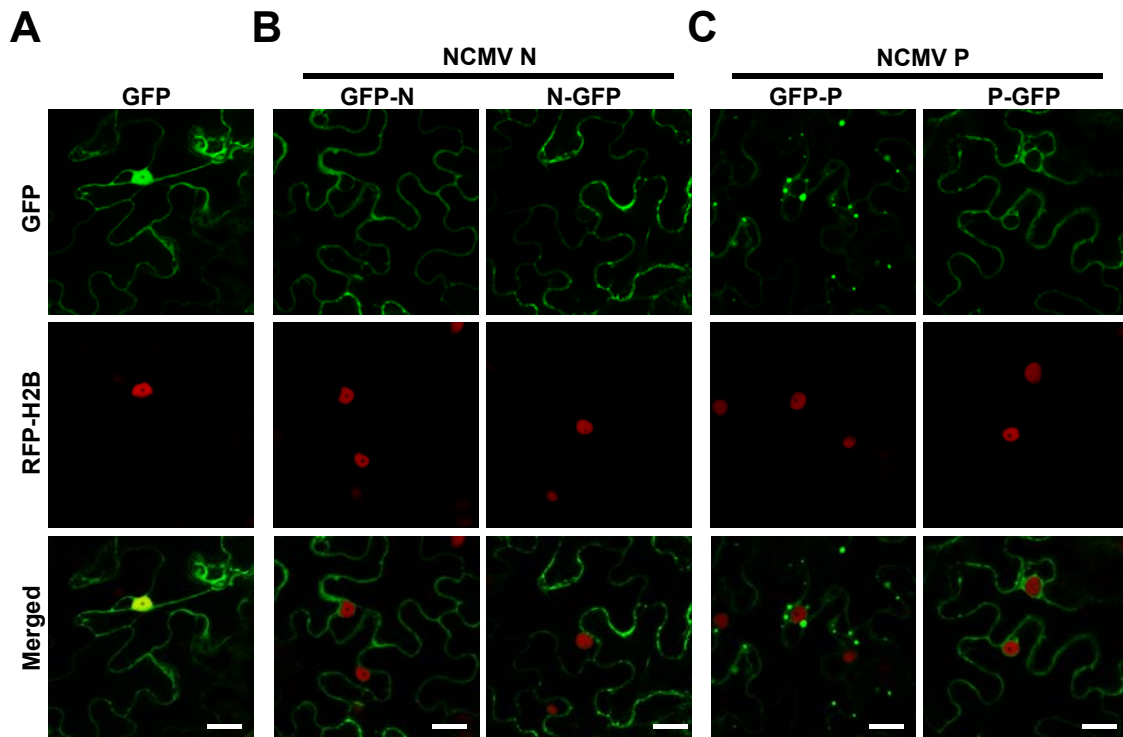

**Supplementary Figure 2. Subcellular localization of the NCMV N and P proteins in the epidermal cells of agroinfiltrated *N. benthamiana* leaves.** Fluorescence images of the infiltrated leaves expressing free GFP, GFP-N, N-GFP, GFP-P, and P-GFP were observed under confocal laser scanning microscopy at 2 dpi. Bars = 20  $\mu$ m.

## Supplementary Figure 3

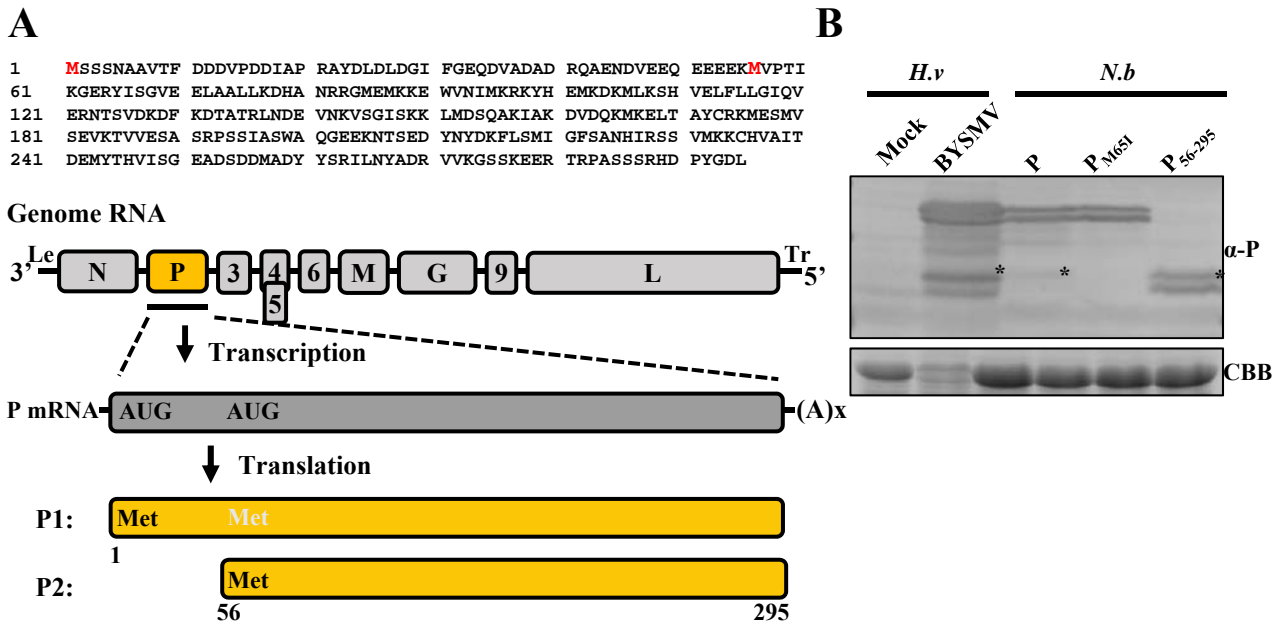

**Supplementary Figure 3. Detection of BYSMV P<sub>56-295</sub> in *Hordeum vulgare* ( *H.v*) infected with BYSMV or agroinfiltrated *N. benthamiana*.** (A) Diagram of the expression patterns of BYSMV P protein isoforms by ribosomal leaky scanning. (B) Immunoblot analysis using P specific antibodies showed P<sub>56-295</sub> were expressed in *Hordeum vulgare* ( *H.v*) infected with BYSMV or agroinfiltrated *N. benthamiana*.

## Supplementary Figure 4

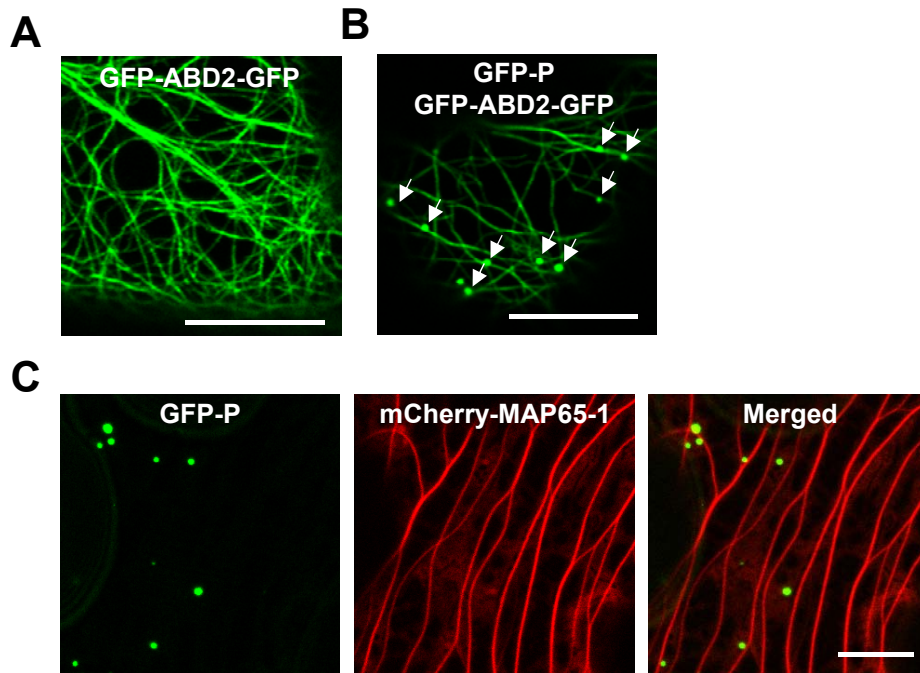

**Supplementary Figure 4. Subcellular localization of the GFP-P inclusion bodies with actin filaments and microtubule in the epidermal cells of agroinfiltrated *N. benthamiana* leaves.** (A) Actin filaments labeled by GFP-ABD2-GFP. (B) Co-expression of BYSMV GFP-P with GFP-ABD2-GFP. Arrows denote sites of GFP-P inclusion bodies. (C) Co-expression of GFP-P with mCherry-MAP65-1-labeled microtubule. Bars = 20 μm.

## Supplementary Figure 5

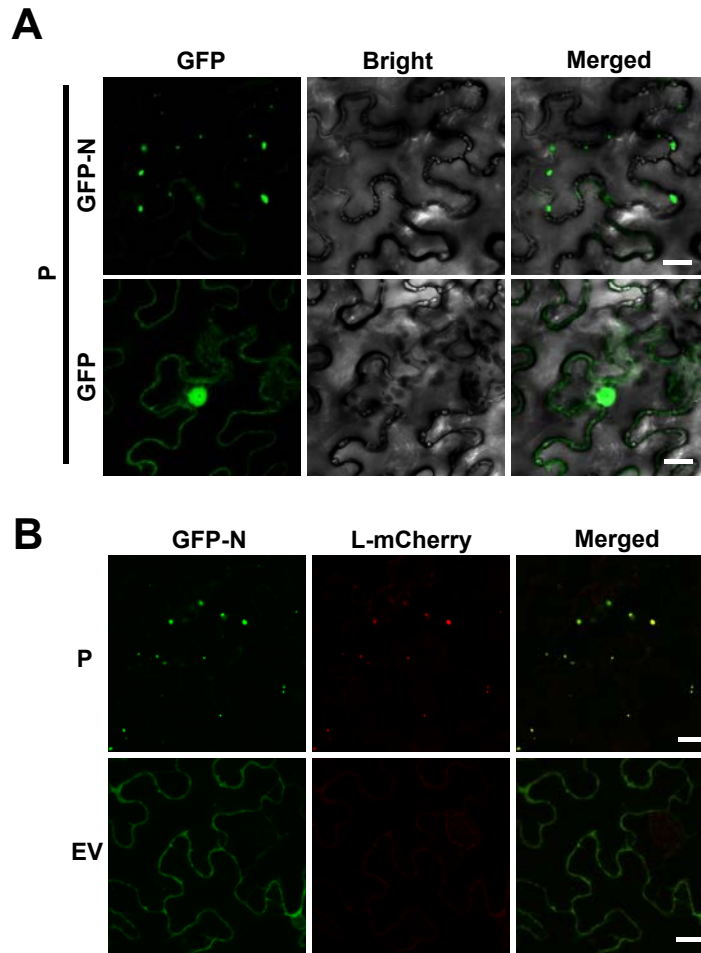

**Supplementary Figure 5. GFP-N and L-mCherry could form inclusion bodies with BYSMV P protein.** (A) GFP-N or GFP were co-expressed with BYSMV P via agroinfiltration in *N.benthamiana* plants, and fluorescence images were observed at 2 dpi. Bar = 20  $\mu\text{m}$ . (B) GFP-N and L-mCherry were co-expressed with BYSMV P or empty vector via agroinfiltration. Fluorescence images were taken at 2 dpi. Bar = 20  $\mu\text{m}$ .
